# Supplementary material for: Two Paralogous Gb3/CD77 Synthases in Birds Show Different Preferences for Their Glycoprotein and Glycosphingolipid Substrates
Source: MDPI journal article supplement (doi:10.3390/ijms22189761), 2021-09-09
Supplement: s1 [file s1]

# Two Paralogous Gb3/CD77 Synthases in Birds Show Different Preferences for Their Glycoprotein and Glycosphingolipid Substrates

Anna Bereznicka <sup>1</sup>, Krzysztof Mikolajczyk <sup>1</sup>, Katarzyna Szymczak-Kulus <sup>1</sup>, Katarzyna Kapczynska <sup>2</sup>,  
Edyta Majorczyk <sup>3</sup>, Anna Modlinska <sup>4</sup>, Tomasz Piasecki <sup>4</sup>, Radoslaw Kaczmarek <sup>1</sup> and Marcin Czerwinski <sup>1,\*</sup>

- <sup>1</sup> Laboratory of Glycobiology, Department of Immunochemistry, Hirszfeld Institute of Immunology and Experimental Therapy, Polish Academy of Sciences, 53-114 Wrocław, Poland; anna.bereznicka@hirszfeld.pl (A.B.); krzysztof.mikolajczyk@hirszfeld.pl (K.M.); katarzyna.szymczak-kulus@hirszfeld.pl (K.S.-K.); radoslaw.kaczmarek@hirszfeld.pl (R.K.)
- <sup>2</sup> Laboratory of Medical Microbiology, Department of Immunology of Infectious Diseases, Hirszfeld Institute of Immunology and Experimental Therapy, Polish Academy of Sciences, 53-114 Wrocław, Poland; katarzyna.kapczynska@hirszfeld.pl
- <sup>3</sup> Faculty of Physical Education and Physiotherapy, Opole University of Technology, 45-758 Opole, Poland; E.Majorczyk@po.edu.pl
- <sup>4</sup> Department of Epizootiology and Clinic of Birds and Exotic Animals, Wrocław University of Environmental Sciences, 50-366 Wrocław, Poland; ana.modlinska@gmail.com (A.M.); tomasz.piasecki@upwr.edu.pl (T.P.)
- \* Correspondence: marcin.czerwinski@hirszfeld.pl

**Table S1.** Antibodies used in the experiments.

| Antibody                                                 | Company                        |
|----------------------------------------------------------|--------------------------------|
| Mouse anti-P1 (clone 650, recognizes Gb3 and P1 antigen) | Ce-Immundiagnostika (Ger-many) |
| Human anti-P1 (clone P3NIL100, recognizes P1 antigen)    | Immucor Inc. (USA)             |
| 6xHis-Tag Monoclonal Antibody (HIS.H8)                   | Thermo Fisher Scientific (USA) |
| Biotinylated goat anti-mouse IgG/A/M (H/L)               | Thermo Fischer Scientific(USA) |
| Goat anti-Mouse IgG (H+L) Secondary Antibody, AP         | Thermo Fisher Scientific (USA) |
| Biotinylated goat anti-human polyvalent immunoglobulins  | Sigma-Aldrich (MERCK) (USA)    |
| Alkaline phosphatase-ExtrAvidin                          | Sigma-Aldrich (MERCK) (USA)    |

**Table S2. A.** Primers used for amplification and sequencing of avian *A4GALT*; abbreviations: F: forward primer, R: reverse primer.

| Name                     | Sequence                          |
|--------------------------|-----------------------------------|
| P_ <i>A4GALT</i> _XhoI_F | 5' CTCGAGATGTCCAGCTACCTGCAA 3'    |
| P_ <i>A4GALT</i> _NotI_R | 5' GGCGGCCGCTCACATTACAGGCCTTGAC3' |

**Table S2. B.** PCR conditions.

| Step                    | Temperature [°C] | Time [hh:mm:ss] |     |
|-------------------------|------------------|-----------------|-----|
| 1. Initial denaturation | 98               | 00:00:30        |     |
| 2. Denaturation         | 98               | 00:00:20        |     |
| 3. Annealing            | 55-60            | 00:00:30        | 30X |
| 4. Extension/elongation | 72               | 00:00:20        |     |
| 5. Final elongation     | 72               | 00:10:00        |     |

**Table S3.** qPCR conditions, primers and probes used for quantitative analysis of avian *A4GALT* transcripts. Abbreviations: M: enzyme M, P: enzyme P.

| Step                 | Number of Cycles           | Temperature [°C] | Time [mm:ss] |
|----------------------|----------------------------|------------------|--------------|
| Initial denaturation | 1                          | 95               | 10:00        |
| Denaturation         | 40                         | 95               | 00:15        |
| Annealing/Extension  |                            | 60               | 01:00        |
| qPCR system          | 7500 Fast                  |                  |              |
| Reaction type        | 96-well plate              |                  |              |
| Reaction volume [μL] | 20                         |                  |              |
| Forward primer       | 5' TGTACTGAAGAACTTGAAGAA C | 3'               |              |
| Reverse primer (P)   | 5' ATGAACTCATGCTTCGG 3'    |                  |              |
| Reverse primer (M)   | 5' ATGAACTCATGCTTGGG 3'    |                  |              |
| Probe (enzyme P)     | 5' TGCCCTCGGGCTCCAGTCTC 3' |                  |              |
| Probe (enzyme M)     | 5' TGCCCTTGGTATTGAGTCTC 3' |                  |              |

|                 |                                                               |      |
|-----------------|---------------------------------------------------------------|------|
| P               | ATGTCCAGCTACCTGCAAAAAGTACCACAGTGTGCGGAGCCACAGGCCTGGGGCTCTG    | 60   |
| M               | ATGTCCAGCTACCTGCAAAAAGTACCACAGTGTGCGGAGCCACAGGCCTGGGGCTCTG    | 60   |
| *****           |                                                               |      |
| P               | TTTATCCTCATCATTTTCATTTCTGCTCGTTGCCTCTGTTGTGTTCTACCAGAGAACTGGG | 120  |
| M               | TTTATCCTCATCATTTTCATTTCTGCTCGTTGCCTCTGTTGTGTTCTACCAGAGAACTGGG | 120  |
| *****           |                                                               |      |
| P               | AAGGACACTGAAGGCCAGCTCTACCACTCGCCTACACAGAACAGGTCTGAAGACTTTTTTG | 180  |
| M               | AAGGACGCTGAGGGCCAGCTCTATGGCTTGTCTATACAAACAGGTGTAAACAGTTTTTC   | 180  |
| ***** * * * * * |                                                               |      |
| P               | ACTTCTCCTCCCCACACCATTGCTGGTGGGTCCTTCTTCCCCAGGGGATGTGTTTTTT    | 240  |
| M               | GCTTCCCTCCCCACACCATTGCTGGTGGGTCCTTCTTCCCCAGGGGATGTGTTTTTT     | 240  |
| **** * * * * *  |                                                               |      |
| P               | GTGGAGACCTCTGAGCGAATTAAACCAAGTTACCTGTTACGTCGCTCTGTGGAGTCAGCG  | 300  |
| M               | GTGGAGACCTCTGAGCAAACTAACCAAGTTACCTGTTACGTCGCTCTGTGGAGTCAGCG   | 300  |
| ***** * * * * * |                                                               |      |
| P               | GCCCGGGCACACCCTGGAACACGGGTTGTGGTGCTCATGAAAGGCCTGGCAAAGGGGAAT  | 360  |
| M               | GCCCGGGCACACCCTGGAACACGGGTTGTGGTGCTCATGAAAGGCCTGGCAAAGGGGAAT  | 360  |
| *****           |                                                               |      |
| P               | GTCTCATTGCCAGCCACTGGGCATTCTCATTGCTGAGCCGCTTCCCCAACGTGGAGATC   | 420  |
| M               | GTCTCATTGCCAGCCACTGGGCATTCTCATTGCTGAGCTGCTTCCCCAACATGGAGATC   | 420  |
| ***** * * * * * |                                                               |      |
| P               | CAGCCCTGGACTTGGCAGAGCTTTTCTCAGGAACACCTCTGGCAAAGTGGTACTCACAG   | 480  |
| M               | CGGCCCTGGACTTGGCAGAGCTTTTCTCAGGAACACCTCTGGCAAAGTGGTACTCACAG   | 480  |
| * * * * *       |                                                               |      |
| P               | CCTGAGCACCAGAAGGAACCTTATTCTTTCCCGTCTGTCTGACGCCTGCAGAATTACC    | 540  |
| M               | CCTGAGCACCAGAAGGAACCTTATTCTTTCCCGTCTGTCTGACGCCTGCAGAATTGCC    | 540  |
| ***** *         |                                                               |      |
| P               | ATCATGTGGAAATTTGGTGGCATCTACCTGGACACAGACTTCATTGTACTGAAGAACTTG  | 600  |
| M               | ATCATGTGGAAATTTGGTGGCATCTACCTGGACACAGACTTCATTGTACTGAAGAACTTG  | 600  |
| *****           |                                                               |      |
| P               | AAGAACCTCACCAATGCCCTCGGGCTCCAGTCTCAGGATGTACTGAATGGGGCCTTCTTG  | 660  |
| M               | AAGAACCTCACCAATGCCCTTGGTATTGAGTCTCAGGATGTGCTGAATGGGGCCTTCTTG  | 660  |
| ***** * * * * * |                                                               |      |
| P               | TCTTTCAAACCGAAGCATGAGTTCATGGAACCTTGCATTACAGACTTTGTGGACAACTAC  | 720  |
| M               | TCCTTCAAACCGAAGCATGAGTTCATAGAACTTGCATGCAGGACTTTGTGATAACTAC    | 720  |
| ** * * * * *    |                                                               |      |
| P               | AATGGGTGGATCTGGGCACACCAGGGCCAGAACTGTTAACACGTGTCTTCAAAAAGTTA   | 780  |
| M               | AAAAGCTGGATCTGGGGGCACCAGGGCCACAGCTACTAACACGTGTCTTCAAGAAGTGG   | 780  |
| ** * * * * *    |                                                               |      |
| P               | TGCTCCATCAGTAATATCCAGAATGGTATGATCTGCAAAGGAGTGAGTGCTCTTCCCTCT  | 840  |
| M               | TGCTCTATCAGTAATATCCAAAGTGGTATGATCTGCAAAGGAGTGAGTGCTCTTCCCTCT  | 840  |
| ***** * * * * * |                                                               |      |
| P               | GATGCTCTTTATCCCATTCATGGCAGGACTGGAAGAAATTATTTGAAGCAATCAGCTCC   | 900  |
| M               | GATGCTCTTTATCCCATTCATGGCAGGACTGGAAGAAATTATTTGAAGCAATCAGCTCC   | 900  |
| *****           |                                                               |      |
| P               | TCAGAGCTTCACAATCTCCTTAAGAACACCTATGCGGTGCACGTATGGAACAACTGAGC   | 960  |
| M               | TCAGAGCTTCACAATCTCCTTAAGAACACCTATGCGGTGCATGTATGGAACAACTGAGC   | 960  |
| ***** * * * * * |                                                               |      |
| P               | CACGATGCAAGGCTAGAGATCACGTCCCAGGCTTTGCTGGCTCAGCTGTATTCTCAGTTC  | 1020 |
| M               | CACGATGCAAGGCTAGAGATCACGTCCCAGGCTTTGCTGGCTCAGCTGTATTCTCAGTTC  | 1020 |
| *****           |                                                               |      |
| P               | TGCCCTGCCACATCTGCACAGATGAAGAAGGACTTTGAAGAGCAGTCAAGGCCTGTAATG  | 1080 |
| M               | TGCCCTGCCACATCTGCACAGATGAAGAAGGACTTTGAAGAGCAGTCAAGGAACTGTAATG | 1080 |
| ***** * * * * * |                                                               |      |
| P               | TGA                                                           | 1083 |
| M               | TGA                                                           | 1083 |
| ***             |                                                               |      |

**Figure S1.** Comparison of the nucleotide sequences of the *A4GALT* paralogs from the wild pigeon (*C. livia*). Sequences were aligned with ClustalW [1]. ‘P’: sequence deposited in GenBank (NM\_001315524.1), ‘M’: sequence found in our laboratory.

## References

1. McWilliam, H.; Li, W.; Uludag, M.; Squizzato, S.; Park, Y.M.; Buso, N.; Cowley, A.P.; Lopez, R. Analysis Tool Web Services from the EMBL-EBI. *Nucleic Acids Res.* **2013**, *41*, 597–600, doi:10.1093/nar/gkt376.
